# Supplementary material for: Mechanistic study of a coke-resistance Ni/ZrO2 catalyst for dry reforming of methane under external electric fields: a combined first-principles and microkinetic modeling study
Source: Royal Society of Chemistry journal article supplement (doi:10.1039/d4cy00416g), 2024-01-01
Supplement: d4cy00416g1.pdf [file d4cy00416g1.pdf]

*Supporting information*

**Mechanistic of Coke-Resistance Ni/ZrO<sub>2</sub> Catalyst for Dry Reforming of Methane  
Under External Electric Fields: A Combined First-Principles and Microkinetic  
Modeling Study**

Hui Jiao <sup>a</sup>, Gui-Chang Wang <sup>a\*</sup>

(<sup>a</sup> Tianjin Key Lab and Molecule-Based Material Chemistry, College of Chemistry, Nankai  
University, Tianjin 300071, China)

\*corresponding author

Tel. +86-22-23502458.

E-mail: wangguichang@nankai.edu.cn.

**Table S1.** The electronic adsorption energy ( $\Delta E_{ads}$ ) in eV and adsorption sites of species on Ni(111) and Ni<sub>16</sub>/ZrO<sub>2</sub> under electric fields.

| Species            | Ni(111) <sup>1</sup> |       |       | Ni <sub>16</sub> /ZrO <sub>2</sub> (110) |       |       | Ni <sub>13</sub> /<br>ZrO <sub>2</sub><br>(101) <sup>2</sup> | Ni <sub>25</sub> /<br>ZrO <sub>2</sub><br>(101) <sup>3</sup> | Ni <sub>13</sub> /<br>CeO <sub>2</sub><br>(111) <sup>4</sup> | Ni <sub>12</sub> /<br>MgO<br>(100) <sup>5</sup> | Ni <sub>55</sub> /<br>Al <sub>2</sub> O <sub>3</sub><br>(110) <sup>6</sup> |
|--------------------|----------------------|-------|-------|------------------------------------------|-------|-------|--------------------------------------------------------------|--------------------------------------------------------------|--------------------------------------------------------------|-------------------------------------------------|----------------------------------------------------------------------------|
|                    | 0.0                  | -0.6  | +0.6  | 0.0                                      | -0.6  | +0.6  |                                                              |                                                              |                                                              |                                                 |                                                                            |
| CH <sub>4</sub> *  | -0.11                | -0.10 | -0.13 | -0.22                                    | -0.45 | -0.30 | -0.31                                                        | -0.35                                                        | -0.44                                                        | -0.05                                           | 0.00                                                                       |
| CH <sub>3</sub> *  | -1.59                | -1.46 | -1.65 | -2.29                                    | -2.09 | -2.49 | -1.95                                                        | -1.49                                                        | -2.57                                                        | -2.12                                           | --                                                                         |
| CH <sub>2</sub> *  | -3.59                | -3.60 | -3.61 | -4.30                                    | -3.98 | -4.36 | -4.37                                                        | -1.98                                                        | -4.52                                                        | -4.03                                           | --                                                                         |
| CH*                | -5.96                | -6.06 | -5.82 | -6.25                                    | -6.28 | -6.42 | -6.19                                                        | -2.97                                                        | -7.20                                                        | -6.24                                           | --                                                                         |
| C*                 | -6.34                | -6.23 | -6.17 | -7.07                                    | -6.52 | -6.68 | -8.71                                                        | --                                                           | -7.88                                                        | -8.15                                           | --                                                                         |
| H*                 | -2.71                | -2.71 | -2.69 | -3.61                                    | -2.76 | -2.71 | -3.89                                                        | --                                                           | -2.68                                                        | -0.20                                           | --                                                                         |
| CO <sub>2</sub> *  | -0.16                | -0.16 | -0.17 | -0.66                                    | -0.88 | -0.48 | -1.51                                                        | --                                                           | --                                                           | -0.76                                           | -1.49                                                                      |
| CO*                | -1.59                | -1.73 | -1.46 | -2.20                                    | -2.28 | -2.24 | -2.09                                                        | -1.35                                                        | -2.18                                                        | -1.81                                           | -1.48                                                                      |
| O*                 | -5.32                | -5.26 | -4.91 | -5.65                                    | -5.55 | -5.52 | -7.70                                                        | --                                                           | -5.86                                                        | -2.42                                           | -6.05                                                                      |
| CHO*               | -2.03                | -1.86 | -1.86 | -2.65                                    | -2.47 | -2.77 | -2.43                                                        | --                                                           | --                                                           | -2.38                                           | --                                                                         |
| CH <sub>2</sub> O* | -0.54                | -0.27 | -0.38 | -1.38                                    | -0.60 | -1.00 | -0.50                                                        | --                                                           | --                                                           | --                                              | --                                                                         |
| COOH*              | -2.05                | -2.22 | -1.79 | -2.71                                    | -2.81 | -2.62 | --                                                           | --                                                           | --                                                           | --                                              | --                                                                         |
| OH*                | -3.19                | -2.72 | -2.98 | -4.18                                    | -3.75 | -3.88 | -3.73                                                        | --                                                           | -3.97                                                        | --                                              | -3.76                                                                      |
| H <sub>2</sub> O*  | -0.23                | -0.12 | -0.23 | -0.53                                    | -0.68 | -0.41 | 0.10                                                         | --                                                           | --                                                           | --                                              | -0.48                                                                      |
| H <sub>2</sub> *   | 0.05                 | 0.14  | -0.01 | -0.40                                    | -0.68 | -0.61 | --                                                           | --                                                           | -0.47                                                        | --                                              | --                                                                         |

**Table S2.** The activation energy ( $\Delta E_a$ ) and reaction energy ( $\Delta E$ ) in eV of all elementary reactions on Ni<sub>16</sub>/ZrO<sub>2</sub> under electric fields.

| Model | Ni <sub>16</sub> /ZrO <sub>2</sub>                        |          |              |            |              |            |              |
|-------|-----------------------------------------------------------|----------|--------------|------------|--------------|------------|--------------|
|       | Electric field                                            | 0.0 V/Å  |              | -0.6 V/Å   |              | +0.6 V/Å   |              |
|       |                                                           | Reaction | $\Delta E_a$ | $\Delta E$ | $\Delta E_a$ | $\Delta E$ | $\Delta E_a$ |
|       | CH <sub>4(g)</sub> → CH <sub>3</sub> *+H*                 | 0.78     | -0.11        | 0.67       | 0.17         | 0.57       | -0.02        |
|       | CH <sub>4(g)</sub> → CH <sub>3</sub> *+H-O <sub>L</sub> * | 0.61     | -1.01        | 0.35       | -1.03        | 0.27       | -1.35        |
|       | CH <sub>3</sub> * → CH <sub>2</sub> *+H*                  | 0.45     | 0.01         | 0.62       | -0.07        | 0.75       | 0.20         |
|       | CH <sub>2</sub> * → CH*+H*                                | 0.40     | -0.27        | 0.37       | -0.35        | 0.34       | -0.24        |
|       | CH* → C*+H*                                               | 1.19     | 0.74         | 1.14       | 0.62         | 1.37       | 0.90         |
|       | CO <sub>2(g)</sub> → CO*+O*                               | 0.13     | -1.73        | -0.18      | -1.62        | 0.14       | -1.76        |
|       | CO <sub>2(g)</sub> +H* → COOH*                            | 0.23     | -0.10        | 0.35       | -0.12        | 0.65       | -0.16        |
|       | COOH* → CO*+OH*                                           | 0.10     | -1.30        | 0.33       | -1.40        | 0.40       | -1.36        |
|       | C*+O* → CO*                                               | 1.23     | -1.79        | 1.29       | -1.39        | 1.20       | -1.93        |
|       | CH*+O* → CHO*                                             | 1.14     | 0.07         | 1.03       | 0.20         | 0.87       | 0.02         |
|       | CHO* → CO*+H*                                             | 0.25     | -1.14        | 0.39       | -1.07        | 0.48       | -0.60        |
|       | CH <sub>2</sub> *+O* → CH <sub>2</sub> O*                 | 1.25     | 0.41         | 1.31       | 0.48         | 1.25       | 0.34         |
|       | CH <sub>2</sub> O* → CHO*+H*                              | 0.51     | -0.29        | 0.42       | -0.52        | 0.50       | 0.04         |
|       | O*+H* → OH*                                               | 1.38     | -0.05        | 1.48       | -0.38        | 1.50       | -0.35        |
|       | OH*+H* → H <sub>2</sub> O <sub>(g)</sub>                  | 1.42     | 0.95         | 1.32       | 0.64         | 1.58       | 1.12         |
|       | H*+H* → H <sub>2(g)</sub>                                 | 0.61     | 0.82         | 0.74       | 1.10         | 0.82       | 1.26         |
|       | 2CO <sub>(g)</sub> → CO <sub>2(g)</sub> +C*               | 1.45     | 1.24         | 0.74       | 0.55         | 0.86       | 0.64         |
|       | C*, diffusion                                             | 0.49     | -0.22        | 0.49       | -0.21        | 0.59       | -0.12        |
|       | 2C* → C-C*                                                | 0.45     | -0.79        | 0.48       | -0.77        | 0.32       | -0.90        |
|       | 2CH* → CH-CH*                                             | 0.27     | -0.55        | 0.35       | -0.37        | 0.21       | -0.56        |

Note: Zero-point energy (ZPE) correction is included.

**Table S3.** The activation energy ( $\Delta E_a$ ) and reaction energy ( $\Delta E$ ) in eV of elementary reactions on other Ni-supported catalysts reported in literature.

| Model                                                     | Ni <sub>16</sub> /     |            | Ni <sub>13</sub> /                  |            | Ni <sub>25</sub> /                  |            | Ni <sub>13</sub> /                  |            | Ni <sub>12</sub> /    |            |
|-----------------------------------------------------------|------------------------|------------|-------------------------------------|------------|-------------------------------------|------------|-------------------------------------|------------|-----------------------|------------|
|                                                           | ZrO <sub>2</sub> (110) |            | ZrO <sub>2</sub> (101) <sup>2</sup> |            | ZrO <sub>2</sub> (101) <sup>3</sup> |            | CeO <sub>2</sub> (111) <sup>4</sup> |            | MgO(100) <sup>5</sup> |            |
| Reaction                                                  | $\Delta E_a$           | $\Delta E$ | $\Delta E_a$                        | $\Delta E$ | $\Delta E_a$                        | $\Delta E$ | $\Delta E_a$                        | $\Delta E$ | $\Delta E_a$          | $\Delta E$ |
| CH <sub>4(g)</sub> → CH <sub>3</sub> *+H*                 | 0.78                   | -0.11      | -0.10                               | -0.87      | 0.57                                | 0.21       | -0.10                               | -0.12      | 3.40                  | 0.05       |
| CH <sub>4(g)</sub> → CH <sub>3</sub> *+H-O <sub>L</sub> * | 0.61                   | -1.01      | --                                  | --         | --                                  | --         | --                                  | --         | --                    | --         |
| CH <sub>3</sub> * → CH <sub>2</sub> *+H*                  | 0.45                   | 0.01       | 0.37                                | -0.34      | 0.80                                | 0.52       | 0.68                                | 0.34       | 2.58                  | 0.77       |
| CH <sub>2</sub> * → CH*+H*                                | 0.40                   | -0.27      | 0.36                                | -0.52      | 0.71                                | 0.54       | 0.36                                | -0.78      | 1.92                  | -0.13      |
| CH* → C*+H*                                               | 1.19                   | 0.74       | 0.38                                | -0.15      | 1.32                                | 0.89       | 0.72                                | -0.16      | 1.39                  | 0.55       |
| CO <sub>2(g)</sub> → CO*+O*                               | 0.13                   | -1.73      | -0.07                               | -1.30      | --                                  | --         | --                                  | --         | -0.33                 | -0.79      |
| CO <sub>2(g)</sub> +H* → COOH*                            | 0.23                   | -0.10      | --                                  | --         | --                                  | --         | --                                  | --         | --                    | --         |
| COOH* → CO*+OH*                                           | 0.10                   | -1.30      | --                                  | --         | --                                  | --         | --                                  | --         | --                    | --         |
| C*+O* → CO*                                               | 1.23                   | -1.79      | 1.12                                | -0.47      | 1.31                                | -1.43      | 1.47                                | -0.31      | 2.24                  | -1.76      |
| CH*+O* → CHO*                                             | 1.14                   | 0.07       | 2.61                                | 0.79       | --                                  | --         | --                                  | --         | 3.28                  | 0.44       |
| CHO* → CO*+H*                                             | 0.25                   | -1.14      | --                                  | --         | --                                  | --         | --                                  | --         | 1.64                  | -1.31      |
| CH <sub>2</sub> *+O* → CH <sub>2</sub> O*                 | 1.25                   | 0.41       | 2.18                                | 1.14       | --                                  | --         | --                                  | --         | --                    | --         |
| CH <sub>2</sub> O* → CHO*+H*                              | 0.51                   | -0.29      | --                                  | --         | --                                  | --         | --                                  | --         | --                    | --         |
| O*+H* → OH*                                               | 1.38                   | -0.05      | 1.10                                | 0.09       | --                                  | --         | --                                  | --         | --                    | --         |
| OH*+H* → H <sub>2</sub> O <sub>(g)</sub>                  | 1.42                   | 0.95       | 1.77                                | 1.51       | --                                  | --         | --                                  | --         | --                    | --         |
| H*+H* → H <sub>2(g)</sub>                                 | 0.61                   | 0.82       | 0.48                                | 0.41       | --                                  | --         | 0.62                                | 0.94       | --                    | --         |
| 2CO <sub>(g)</sub> → CO <sub>2(g)</sub> +C*               | 1.45                   | 1.24       | --                                  | --         | --                                  | --         | --                                  | --         | --                    | --         |
| C*, diffusion                                             | 0.49                   | -0.22      | --                                  | --         | --                                  | --         | --                                  | --         | --                    | --         |
| 2C* → C-C*                                                | 0.45                   | -0.79      | --                                  | --         | 0.42                                | -1.39      | --                                  | --         | --                    | --         |
| 2CH* → CH-CH*                                             | 0.27                   | -0.55      | --                                  | --         | --                                  | --         | --                                  | --         | --                    | --         |

**Table S4.** The distance of TS in all elementary reactions on Ni<sub>16</sub>/ZrO<sub>2</sub> under electric fields. (Unit: Å)

| Reaction (distance of TS)                                      | Ni <sub>16</sub> /ZrO <sub>2</sub> |          |          |
|----------------------------------------------------------------|------------------------------------|----------|----------|
|                                                                | 0.0 V/Å                            | -0.6 V/Å | +0.6 V/Å |
| CH <sub>4(g)</sub> → CH <sub>3</sub> *+H* (d <sub>C-H</sub> )  | 1.658                              | 1.641    | 1.679    |
| CH <sub>4(g)</sub> → CH <sub>3</sub> *+OH* (d <sub>C-H</sub> ) | 1.358                              | 1.357    | 1.360    |
| CH <sub>3</sub> * → CH <sub>2</sub> *+H* (d <sub>C-H</sub> )   | 1.793                              | 1.812    | 1.794    |
| CH <sub>2</sub> * → CH*+H* (d <sub>C-H</sub> )                 | 1.714                              | 1.711    | 1.638    |
| CH* → C*+H* (d <sub>C-H</sub> )                                | 1.629                              | 1.610    | 1.609    |
| CO <sub>2</sub> * → CO*+O* (d <sub>C-O</sub> )                 | 1.730                              | 1.773    | 1.729    |
| CO <sub>2</sub> *+H* → COOH* (d <sub>C-H</sub> )               | 1.408                              | 1.406    | 1.407    |
| COOH* → CO*+OH* (d <sub>C-O</sub> )                            | 1.621                              | 1.697    | 1.660    |
| C*+O* → CO* (d <sub>C-O</sub> )                                | 1.915                              | 1.913    | 1.908    |
| CH*+O* → CHO* (d <sub>C-O</sub> )                              | 1.884                              | 1.879    | 1.887    |
| CHO* → CO*+H* (d <sub>C-H</sub> )                              | 1.191                              | 1.180    | 1.175    |
| CH <sub>2</sub> *+O* → CH <sub>2</sub> O* (d <sub>C-O</sub> )  | 1.929                              | 1.927    | 1.931    |
| CH <sub>2</sub> O* → CHO*+H* (d <sub>C-H</sub> )               | 1.715                              | 1.672    | 1.577    |
| O*+H* → OH* (d <sub>O-H</sub> )                                | 1.392                              | 1.388    | 1.363    |
| OH*+H* → H <sub>2</sub> O* (d <sub>O-H</sub> )                 | 1.509                              | 1.492    | 1.532    |
| H*+H* → H <sub>2</sub> * (d <sub>H-H</sub> )                   | 1.313                              | 1.316    | 1.303    |
| 2CO* → CO <sub>2</sub> *+C* (d <sub>C-O</sub> )                | 1.916                              | 1.756    | 2.033    |
| 2C* → C <sub>2</sub> * (d <sub>C-C</sub> )                     | 2.029                              | 2.024    | 2.021    |
| 2CH* → C <sub>2</sub> H <sub>2</sub> * (d <sub>C-C</sub> )     | 2.014                              | 2.005    | 2.024    |

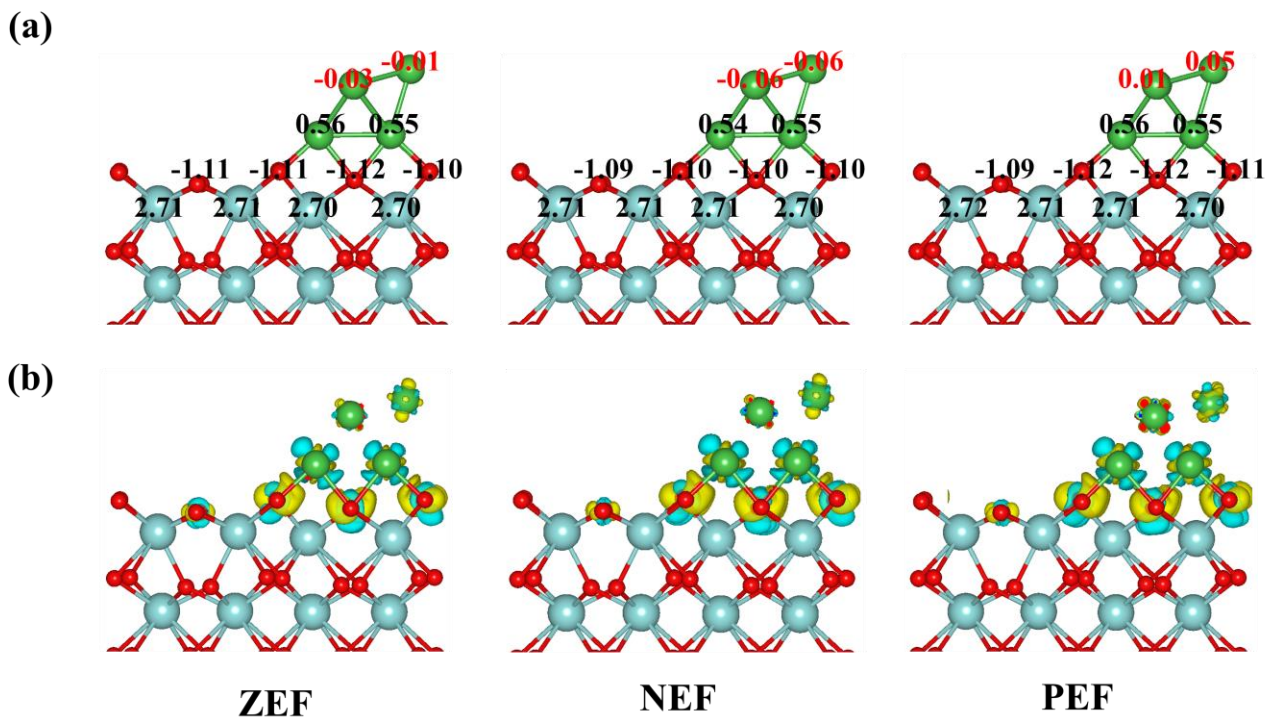

**Figure S1.** The (a) Bader charge and (b) charge density difference plot of  $\text{Ni}_{16}/\text{ZrO}_2$  with ZEF, NEF and PEF. (The values in the figure represent the charge of single atom.) The green, red, grayish-green, and purple represent Ni, O, and Zr, respectively. Isosurface level used for the charge density plot was  $0.007 \text{ e}/\text{Bohr}^3$ . The yellow (cyan) color represents the charge accumulation (depletion).

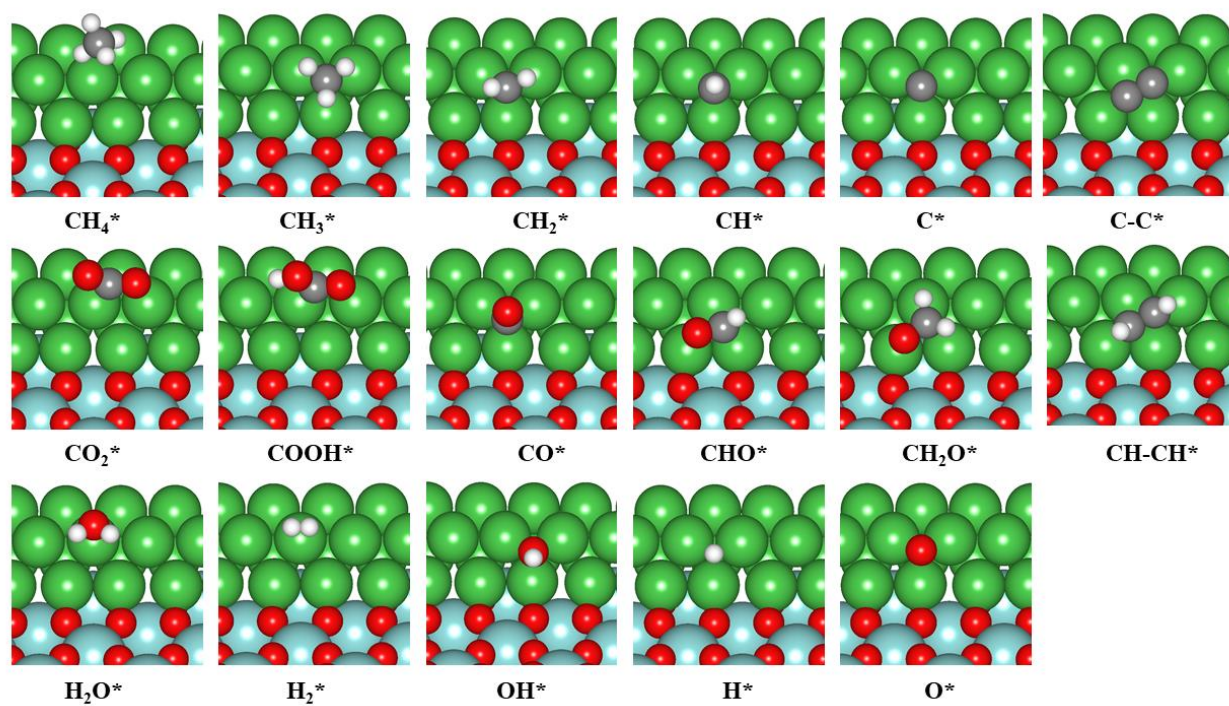

**Figure S2.** The front view of the DRM intermediates on  $\text{Ni}_{16}/\text{ZrO}_2$  interface. The green, red, and grayish-green represent Ni, O, and Zr, respectively.

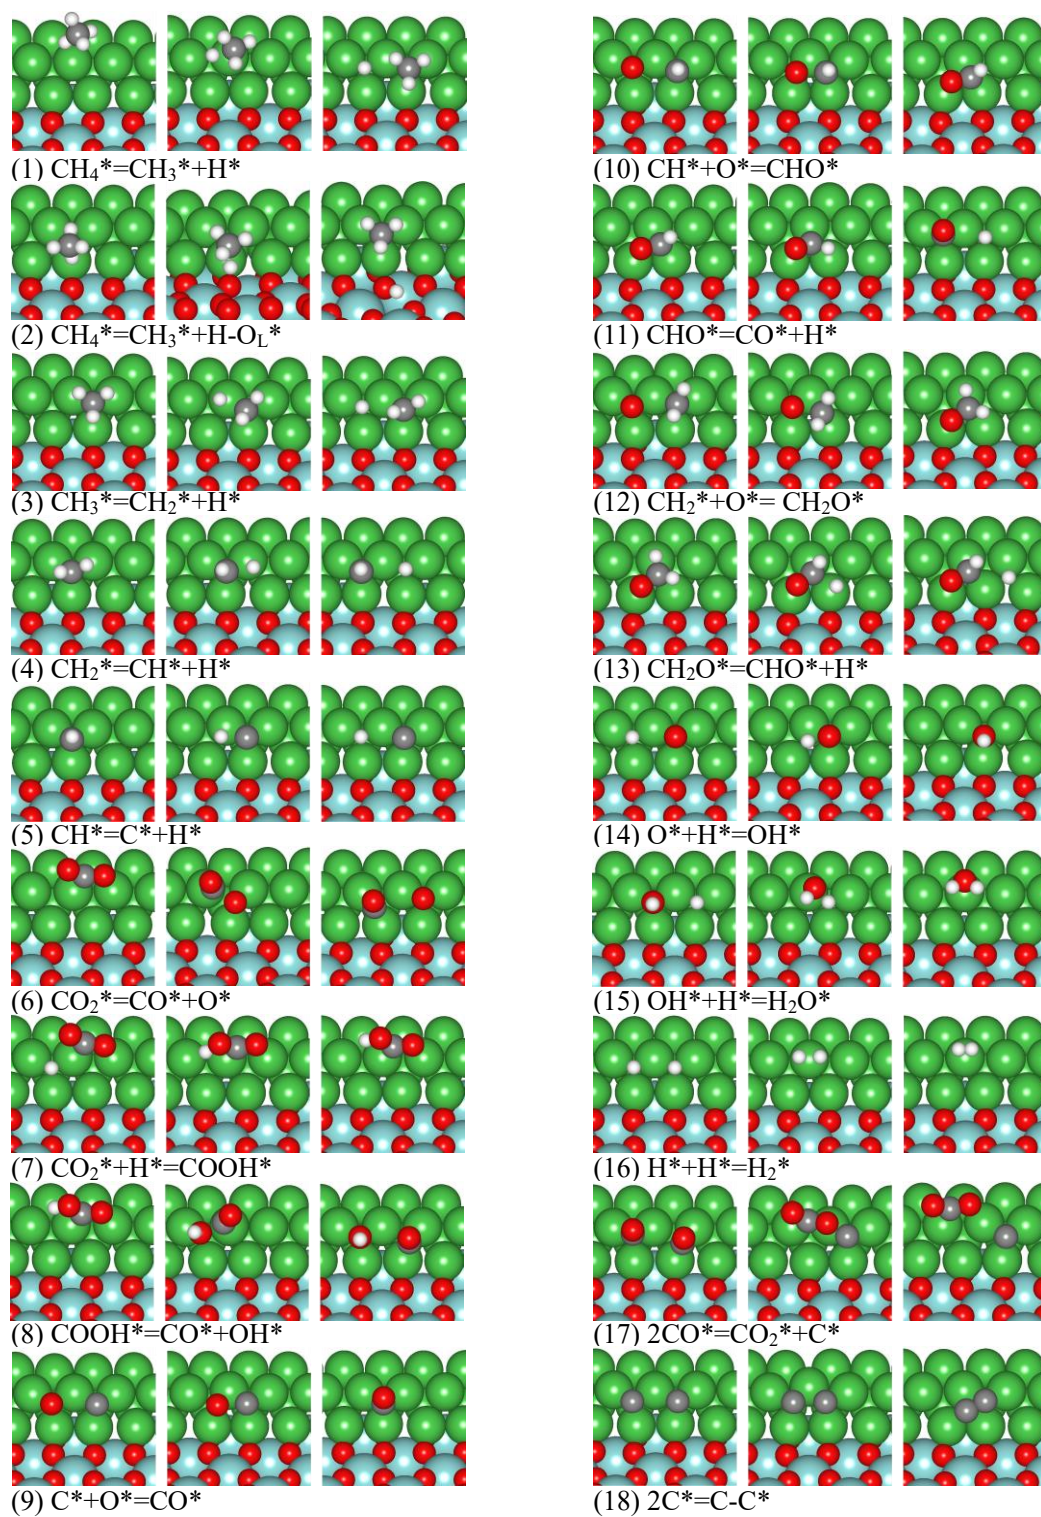

**Figure S3.** The front view of IS, TS, and FS of elementary reaction involved in DRM reaction on  $\text{Ni}_{16}/\text{ZrO}_2$  surface.



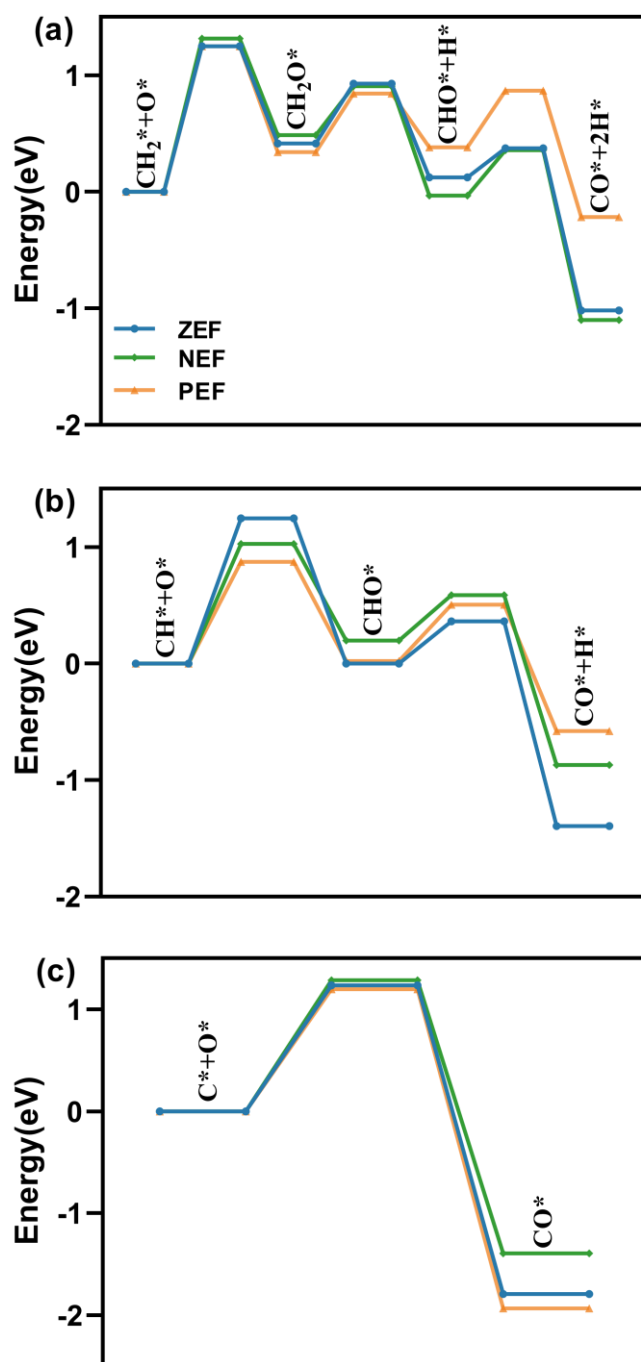

**Figure S4.** Potential energy profiles of (a) CH<sub>2</sub>-O, (b) CH-O, and (c) C-O oxidation on Ni<sub>16</sub>/ZrO<sub>2</sub> and under electric fields.

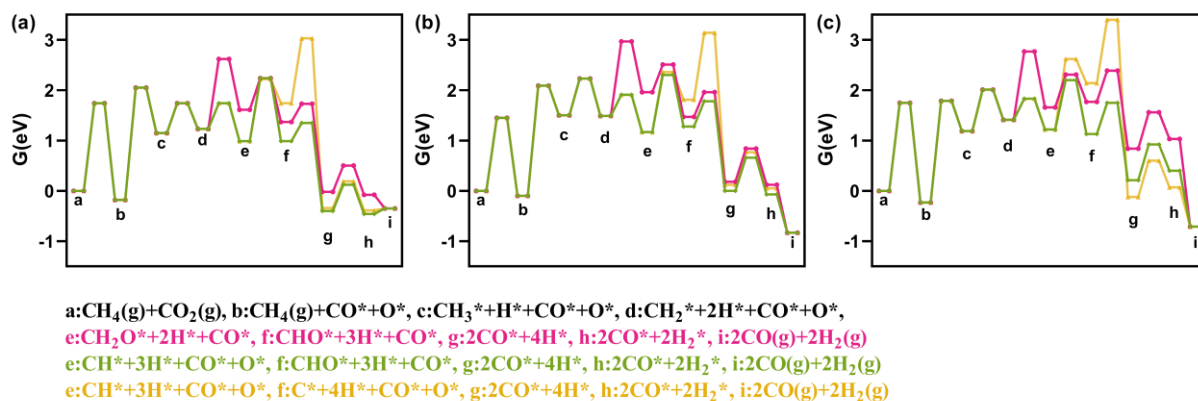

**Figure S5.** Gibbs free energy profiles of  $\text{CH}_x\text{-O}$  (0-2) oxidation DRM reaction pathways on  $\text{Ni}_{16}/\text{ZrO}_2$  under (a) ZEF, (b) NEF, and (c) PEF at 1073.15 K.

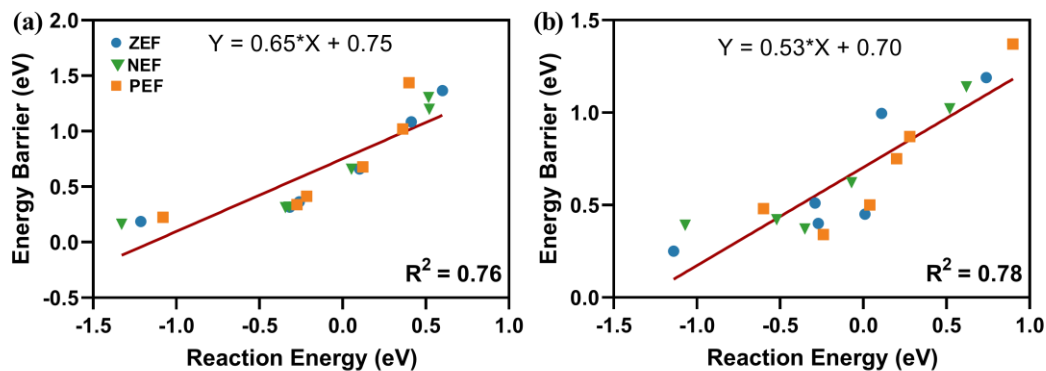

**Figure S6.** Relationship of the energy barrier and reaction energy for C-H breaking (R1, R3-5, R11, and R13) elementary reactions involved in the DRM reaction on (a)  $\text{Ni}(111)$  and (b)  $\text{Ni}_{16}/\text{ZrO}_2$  under electric fields.

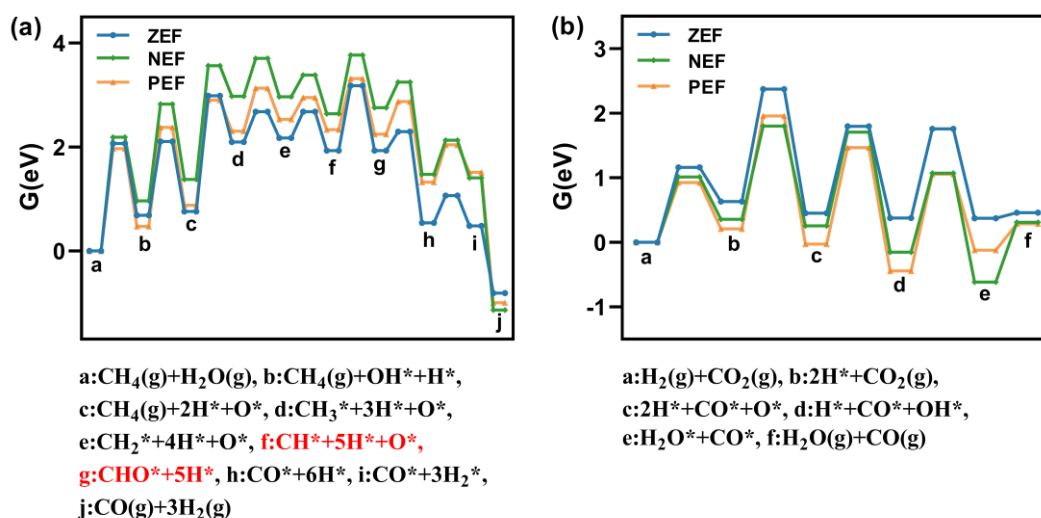

**Figure S7.** Gibbs free energy profiles of the most favorable (a) SRM reaction and (b) RWGS reaction on  $\text{Ni}_{16}/\text{ZrO}_2$  under electric fields at 1073.15 K.

## References

- 1 H. Jiao and G.-C. Wang, *Catal. Sci. Technol.*, 2023, **13**, 5407–5421.
- 2 H. Yang, H. Wang, L. Wei, Y. Yang, Y.-W. Li, X. Wen and H. Jiao, *Phys. Chem. Chem. Phys.*, 2021, **23**, 26392–26400.
- 3 J. Niu, C. Zhang, K. Li, H. Liu, Y. Jin and J. Ran, *Int. J. Hydrogen Energy*, 2024, **59**, 1399–1408.
- 4 A. Salcedo, P. G. Lustemberg, N. Rui, R. M. Palomino, Z. Liu, S. Nemsak, S. D. Senanayake, J. A. Rodriguez, M. V. Ganduglia-Pirovano and B. Irigoyen, *ACS Catal.*, 2021, **11**, 8327–8337.
- 5 Y. Guo, J. Feng and W. Li, *Chin. J. Chem. Eng*, 2017, **25**, 1442–1448.
- 6 L. Foppa, T. Margossian, S. M. Kim, C. Müller, C. Copéret, K. Larmier and A. Comas-Vives, *J. Am. Chem. Soc.*, 2017, **139**, 17128–17139.
